# Supplementary material
Source: bioRxiv or medRxiv preprint supplement (https://www.biorxiv.org/highwire/filestream/106287/field_highwire_adjunct_files/2/350389-3.pdf)
Supplement: Supplementary file [file 350389-3.pdf]

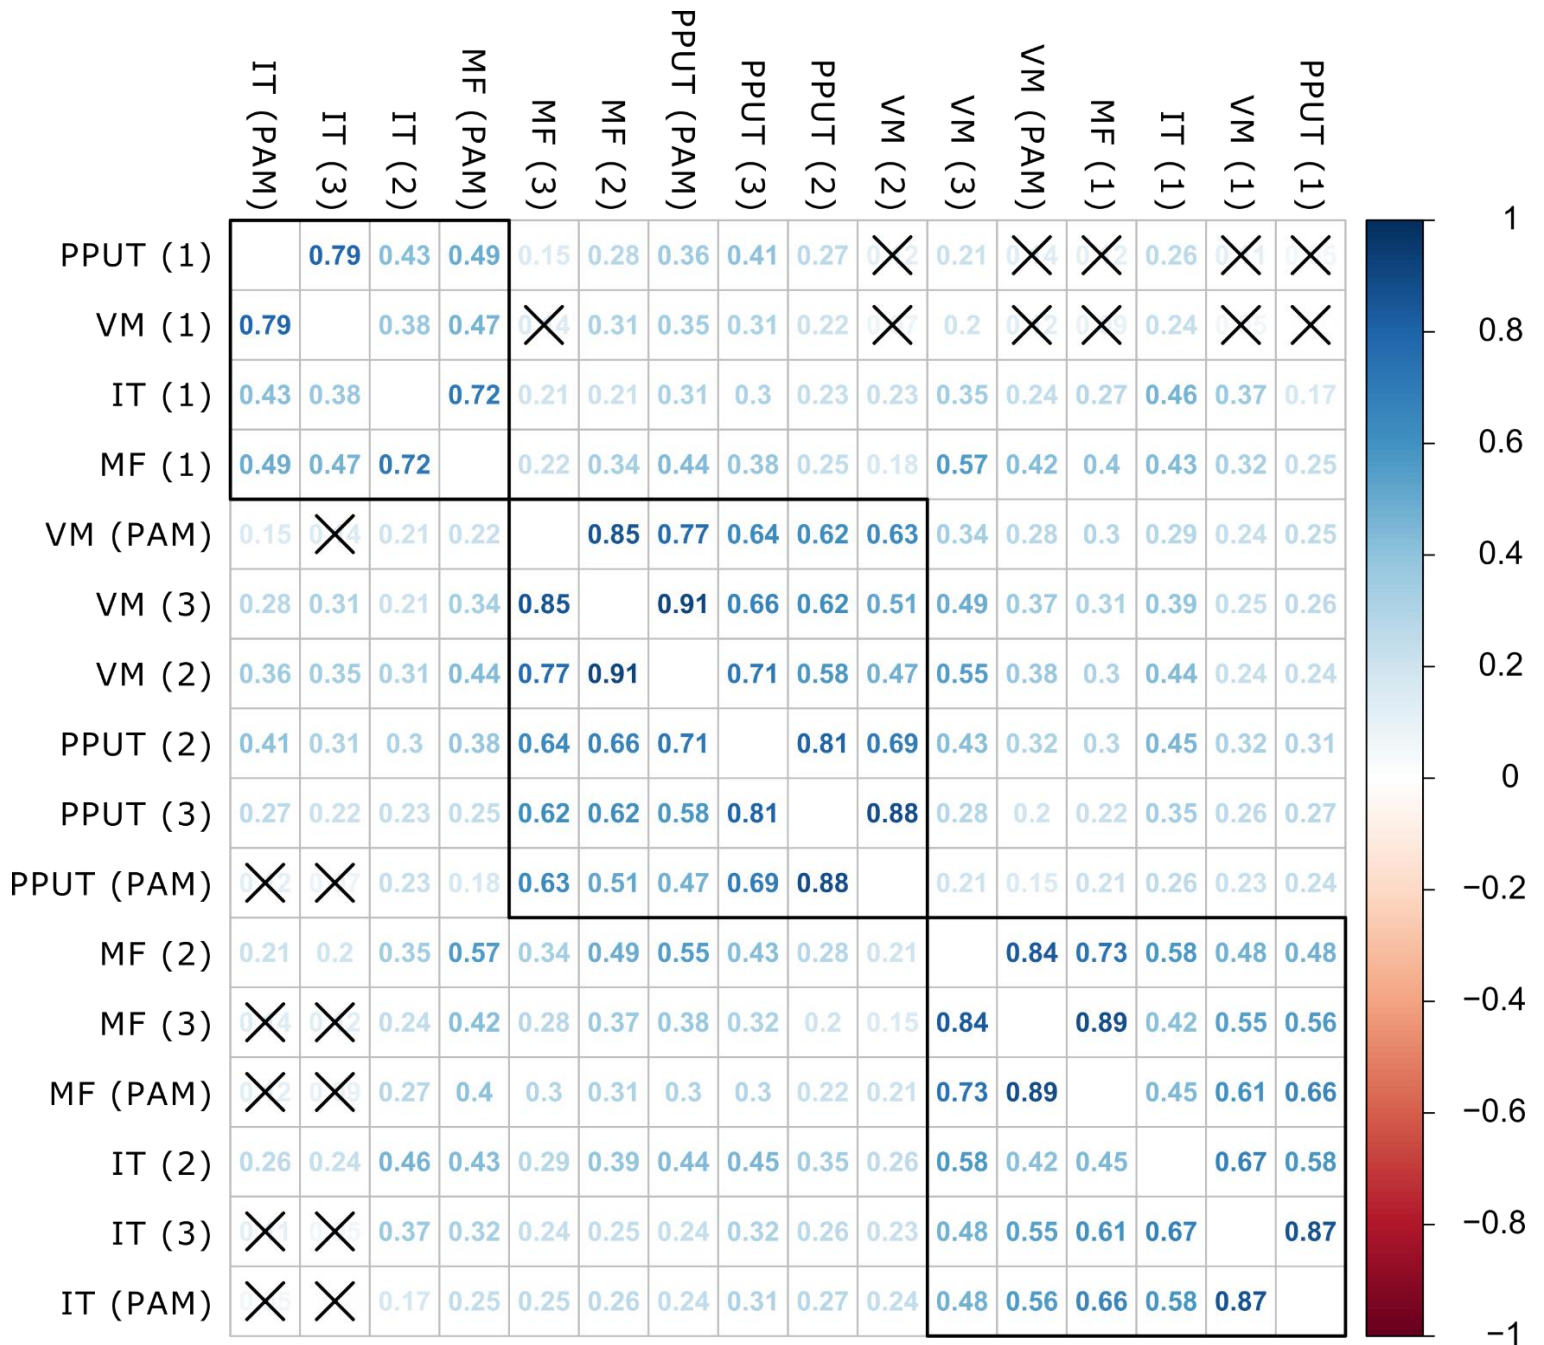

Supplementary Figure 1.

**a**

Histograms of midfrontal cortex (MF) PAM distribution

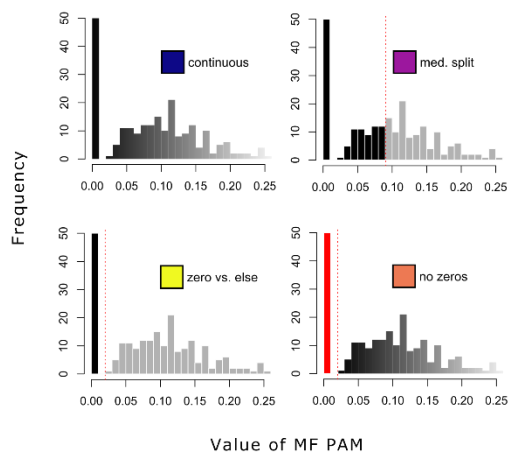

Supplementary Figure 2.

**b**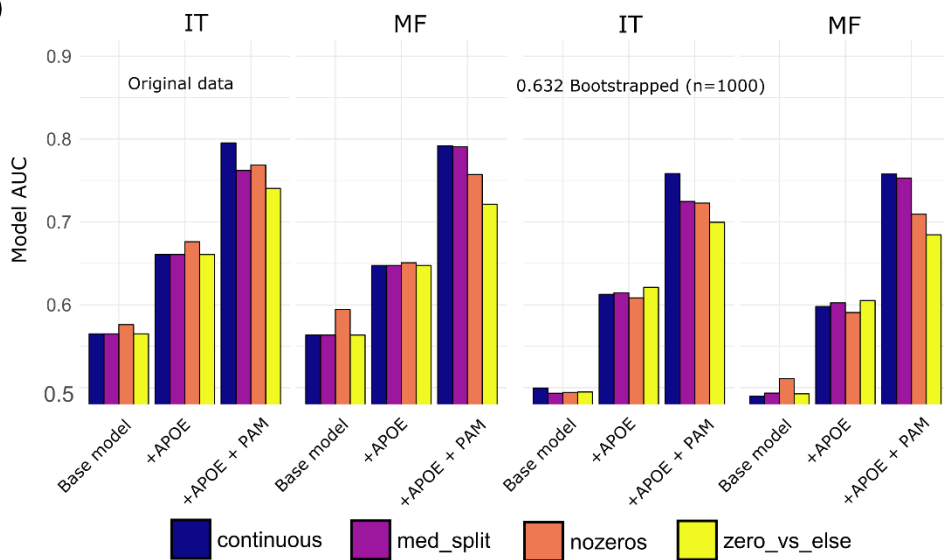

$-\log_{10}(p\text{-value}) * \text{direction of effect}$

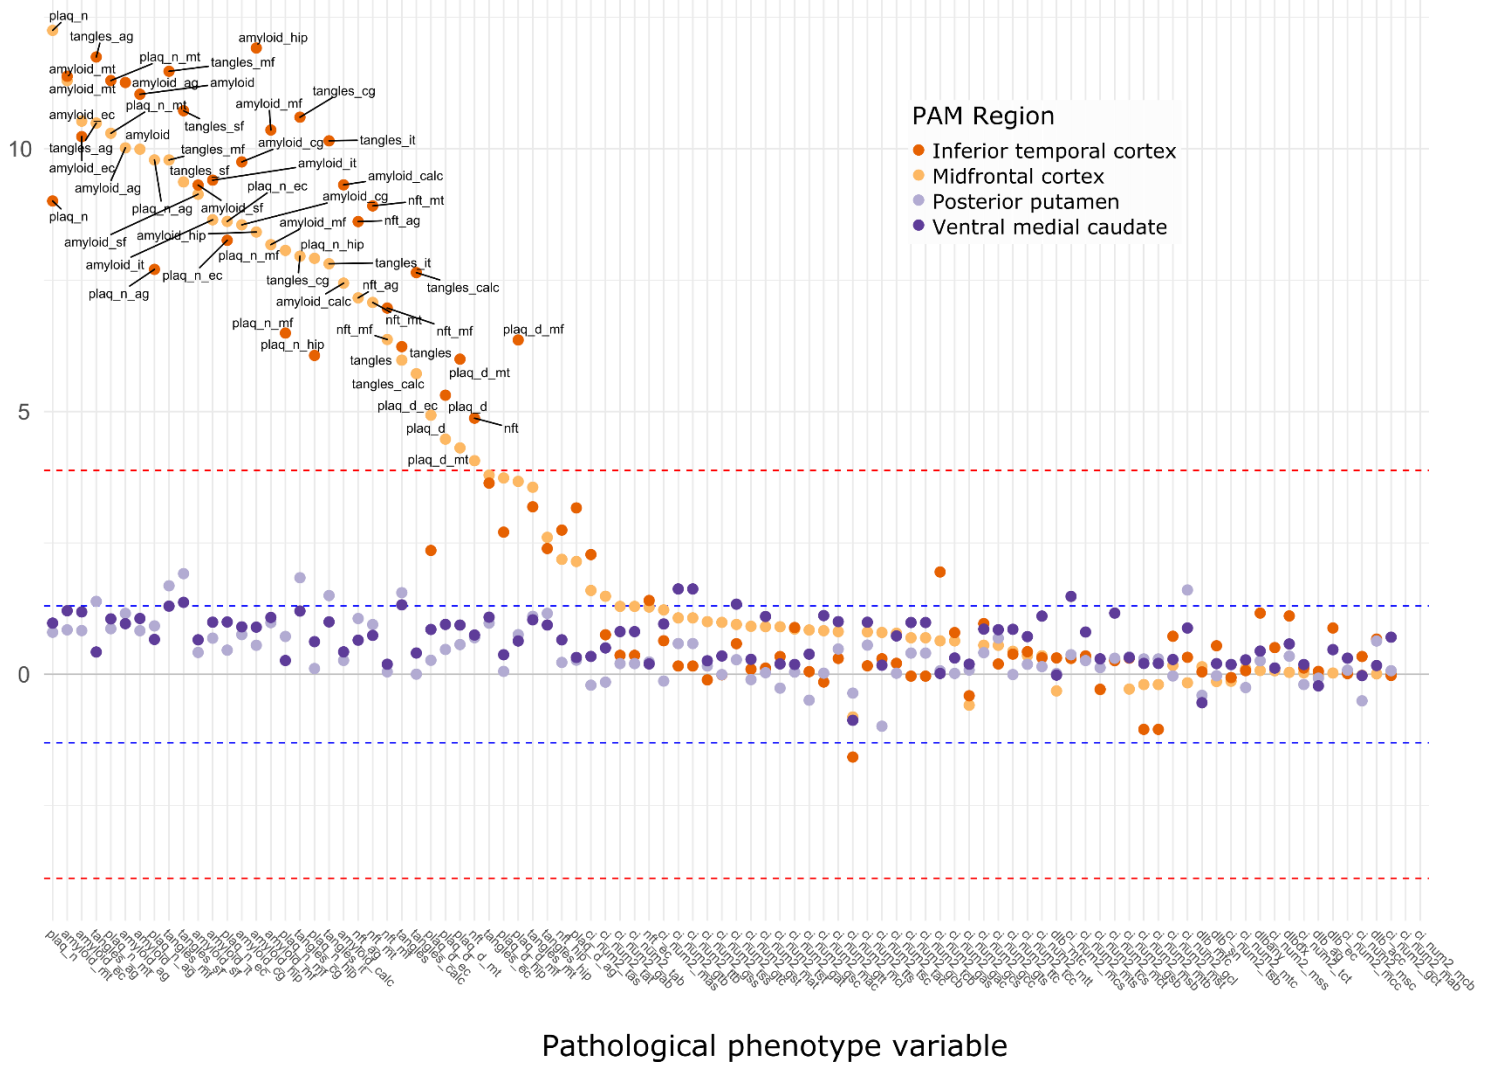

Supplementary Figure 3.



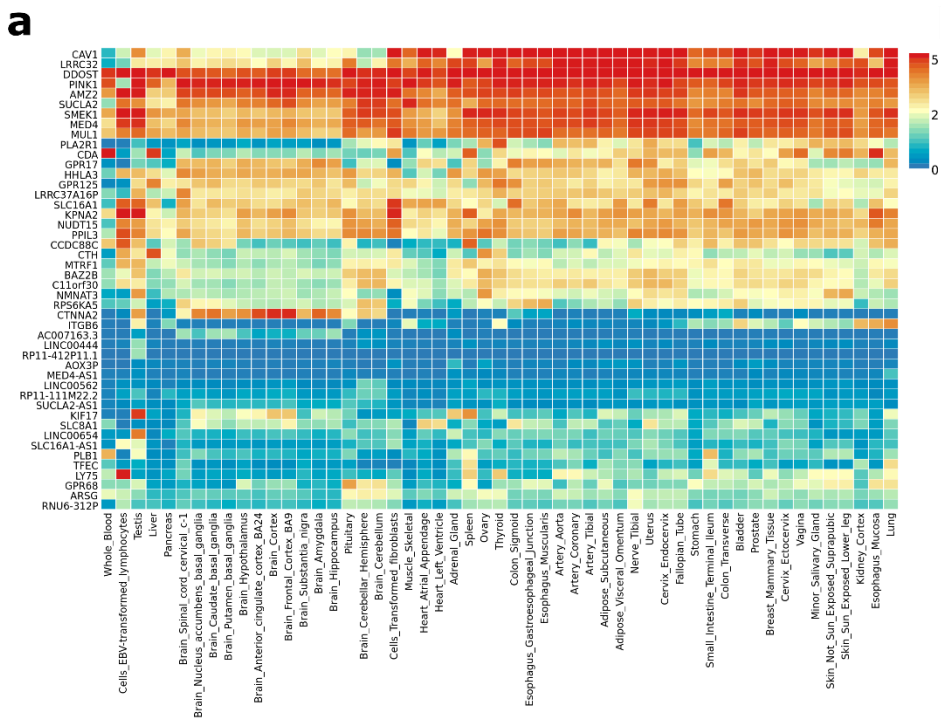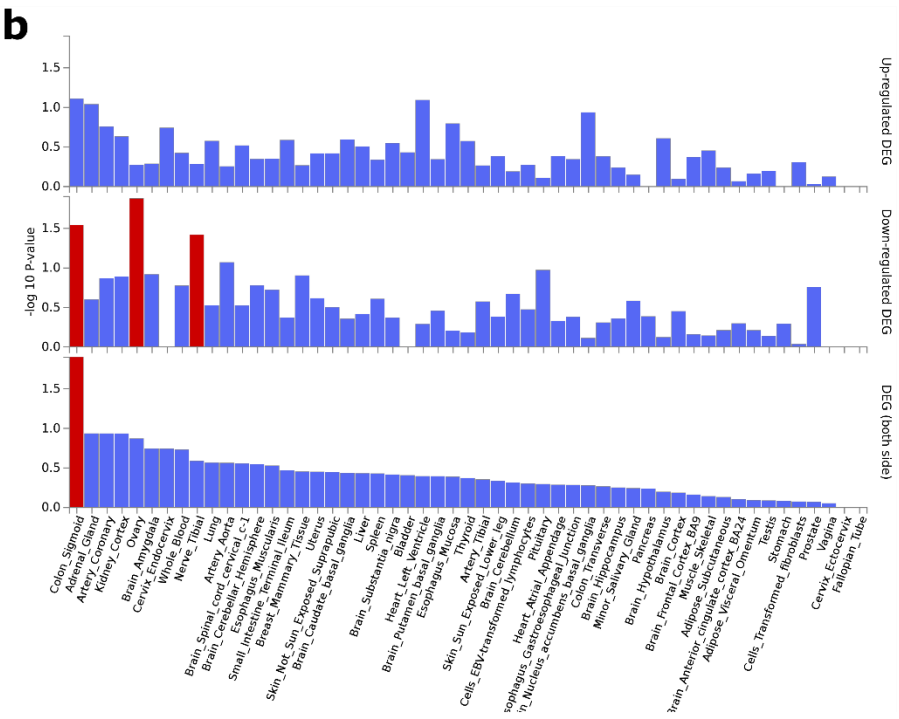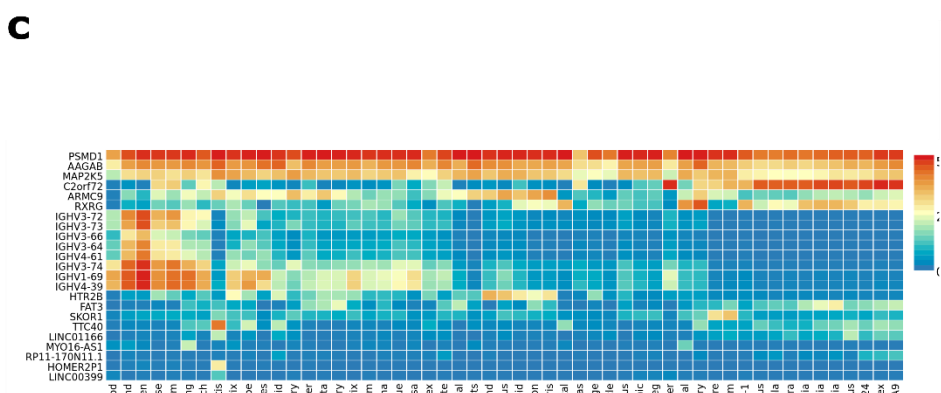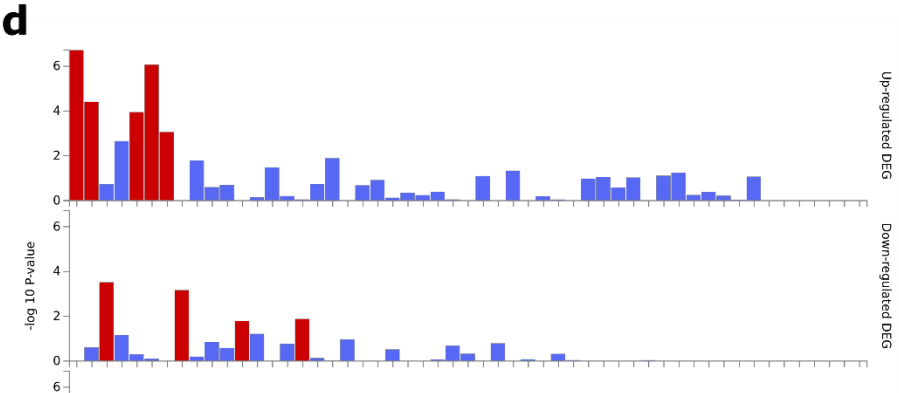

Supplementary Figure 5.
